# Supplementary material
Source: Springer Nature journal article supplement (https://www.springermedizin.de/resource/supplementary/12913_2008_686_MOESM1_ESM.pdf/9535312)
Supplement: MOESM1 [file 9535312]

# Western Australian Notifiable Infectious Disease Database

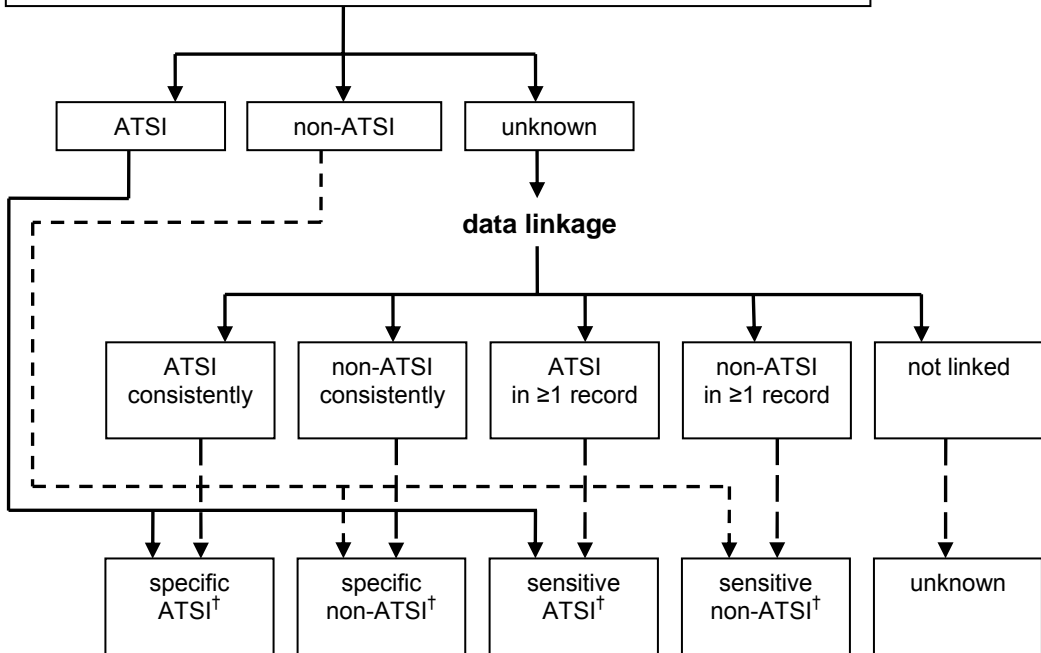

†classifications are not mutually exclusive
